# Supplementary material
Source: PubMed Central journal article supplement (PMC5831509)
Supplement: NIHMS940130-supplement-15.pdf [file NIHMS940130-supplement-15.pdf]

**Supplementary Table 8:** Oligonucleotide sequences used in this study

| Oligo name                                       | Oligo sequence (5' -> 3') | Tm (°C) | ET (s) | Polymerase    |
|--------------------------------------------------|---------------------------|---------|--------|---------------|
| <b>CRISPR/Cas9 SVA editing</b>                   |                           |         |        |               |
| sgRNA 7 SVA-F                                    | CACCGTGTTTAGTTTTACAAGACA  |         |        |               |
| sgRNA 7 SVA-R                                    | AACTGTCTTGATAAACTAAACAC   |         |        |               |
| sgRNA 9 SVA-F                                    | CACCGATGTGGAAAAAATGTAC    |         |        |               |
| sgRNA 9 SVA-R                                    | AAACGTACATTTTTTTCCACATC   |         |        |               |
| <b>Novel DSC validation</b>                      |                           |         |        |               |
| DSCn1_A-F                                        | GAGACAGAGTCACTATATCCTG    | 60      | 15     | Phusion       |
| DSCn1_A-R                                        | GGATAAGAGTAAGAATACAGATGG  |         |        |               |
| DSCn1_B-F                                        | GAATACAGATGGGCACGGTG      | 64      | 60     | PrimeStar GXL |
| DSCn1_B-R                                        | GAGACAGAGTCACTATATCCTG    |         |        |               |
| DSCn4-F                                          | CCC GCC ACCAA ACCCGAGTA   | 60      | 60     | PrimeStar GXL |
| DSCn4-R                                          | AGCCGGTCGTTGTTGCGTGT      |         |        |               |
| DSCn6_inner-F                                    | CTAGGTGTGGTGGTTCATGC      | 65      | 15     | Phusion       |
| DSCn6_inner-R                                    | TCCGTGGCTCAAATGATCC       |         |        |               |
| DSCn6_outer-F                                    | GCCCCGCCATCTATTTGTTT      | 60      | 30     | Phusion       |
| DSCn6_outer-R                                    | CGAACTCCGTGGCTCAAAT       |         |        |               |
| DSCn6-Seq-F                                      | GACTGTAATGTGCTTGATGTG     |         |        |               |
| DSCn7_inner-F                                    | AGAGGGATGAATACGTGGAGT     | 61      | 15     | Phusion       |
| DSCn7_inner-R                                    | TTGCTGTTAGCCGAGATTGC      |         |        |               |
| DSCn7_outer-F                                    | TGACATTCTGAAAGGGCAA       | 65      | 30     | Phusion       |
| DSCn7_outer-R                                    | GGTGCGGTGACTCATGACTA      |         |        |               |
| DSCr1-F                                          | CGCCTTCCCCCTCCTCCTA       | 64      | 60     | PrimeStar GXL |
| DSCr1-R                                          | GCACCGTTTCTCCCTCCCT       |         |        |               |
| DSCr11_A-F                                       | GAGACGGAATTTTACTCTCGTTG   | 60      | 15     | Phusion       |
| DSCr11_B-F                                       | GGTACTTATTTCTCCAGCTTCG    |         |        |               |
| DSCr11-R                                         | GTCTTGACTTCCATTCACAGG     |         |        |               |
| DSCr12-F                                         | TGGGAGGCAAGGCAATACAG      | 62      | 60     | PrimeStar GXL |
| DSCr12-R                                         | GTTTCCAATATCCCTGAGTTCTAG  |         |        |               |
| DSCn33_A-F                                       | TAAGAGGCAGAGTCTCGTTCTG    | 60      | 15     | Phusion       |
| DSCn33_A-R                                       | AGAGGCTGGTGGATTACCTG      |         |        |               |
| DSCr33_B-F                                       | GAGGCAGAGTCTCGTTCTGTCG    | 62      | 60     | PrimeStar GXL |
| DSCr33_B-R                                       | GTGTCTCAAATTAGCCGGCTGT    |         |        |               |
| DSCr33_B-Seq-R                                   | CAGGCACAGTGGCTCACGCCT     |         |        |               |
| DSCr5-F                                          | TTGCCCCCTTTGGGCTGCTT      | 64      | 60     | PrimeStar GXL |
| DSCr5-R                                          | GCAGAACTGGGGAGGGGGT       |         |        |               |
| DSCr6-F                                          | CTGCTTCCAGCGCCTCTCCT      | 64      | 60     | PrimeStar GXL |
| DSCr6-R                                          | CCCCAGATGTGTGGCTGGTGT     |         |        |               |
| DSCr7_A-F                                        | GAATGGATTGCTTGAGCCAG      | 60      | 15     | Phusion       |
| DSCr7_B-F                                        | GCACCGTGGCTCATTCTATG      |         |        |               |
| DSCr7-R                                          | GTGTTATTGTCTGGGCATGGTG    |         |        |               |
| DSCr9-F                                          | GAGTCTGTTCTGTGGCCAAG      | 60      | 15     | Phusion       |
| DSCr9-R                                          | ATTGCGCCACTACACTGCAG      |         |        |               |
| <b>Cell model development iPSC reprogramming</b> |                           |         |        |               |
| NANOG-F                                          | CAGTCTGGACACTGGCTGAA      |         |        |               |
| NANOG-R                                          | CTCGCTGATTAGGCTCCAAC      |         |        |               |
| OCT4-F                                           | TGTA CT CCTCGGTCCCTTTC    |         |        |               |
| OCT4-R                                           | TCCAGGTTTTCTTTCCCTAGC     |         |        |               |
| REX1-F                                           | TGGACACGTCTGTGCTCTTC      |         |        |               |
| REX1-R                                           | GTCTTGGCGTCTTCTCGAAC      |         |        |               |
| SOX2-F                                           | GCTAGTCTCCAAGCGACGAA      |         |        |               |
| SOX2-R                                           | GCAAGAAGCCTCTCCTTGAA      |         |        |               |
| hTERT-F                                          | TGTGCACCAACATCTACAAG      |         |        |               |
| hTERT-R                                          | GCGTTCTTGGCTTTCAGGAT      |         |        |               |
| DNMT3B-F                                         | ATAAGTCAAGGTGCGTCGT       |         |        |               |
| DNMT3B-R                                         | GGCAACATCTGAAGCCATTT      |         |        |               |
